# Supplementary material
Source: PubMed Central journal article supplement (PMC8635409)
Supplement: NIHMS1753168-supplement-Table_S1.pdf [file NIHMS1753168-supplement-Table_S1.pdf]

**Supplemental information**

**ELAVL4, splicing, and glutamatergic  
dysfunction precede neuron loss  
in *MAPT* mutation cerebral organoids**

**Kathryn R. Bowles, M. Catarina Silva, Kristen Whitney, Taylor Bertucci, Joshua E. Berlind, Jesse D. Lai, Jacob C. Garza, Nathan C. Boles, Sidhartha Mahali, Kevin H. Strang, Jacob A. Marsh, Cynthia Chen, Derian A. Pugh, Yiyuan Liu, Ronald E. Gordon, Susan K. Goderie, Rebecca Chowdhury, Steven Lotz, Keith Lane, John F. Crary, Stephen J. Haggarty, Celeste M. Karch, Justin K. Ichida, Alison M. Goate, and Sally Temple**

**Table S1. Human iPSC lines used to generate 3D cerebral organoids.**

| <i>MAPT</i>  | Age at Biopsy | iPSC Line        | Abbreviated ID | Sanger seq. confirmed? | Karyotype |
|--------------|---------------|------------------|----------------|------------------------|-----------|
| <i>V337M</i> | 40s           | ND32951A.15Δ2B09 | NDB09          | yes                    | normal    |
| <i>V337V</i> | 40s           | ND32951A.15Δ1B06 | NDB06          | yes                    | normal    |
| <i>V337M</i> | 60s           | GIH-6-C1-ΔA02    | GIH6-A02       | yes                    | normal    |
| <i>V337V</i> | 60s           | GIH-6-C1-Δ1E11   | GIH6-E11       | yes                    | normal    |
| <i>V337M</i> | 30s           | GIH-7-C2-Δ2A01   | GIH7-A01       | yes                    | normal    |
| <i>V337V</i> | 30s           | GIH-7-C2-Δ2B12   | GIH7-B12       | yes                    | normal    |
| <i>V337V</i> | 30s           | GIH-7-C2-Δ2F02   | GIH7-F02       | yes                    | normal    |
| <i>WT</i>    | 50s           | ND03231          | 3231           | no                     | normal    |
